# Supplementary material for: VEGFA contributes to tumor property of glioblastoma cells by promoting differentiation of myeloid-derived suppressor cells
Source: PubMed Central journal article supplement — BMC Cancer. 2024 Aug 22;24:1040. doi: 10.1186/s12885-024-12803-8 (PMC11342494; doi:10.1186/s12885-024-12803-8), 2024-08-22

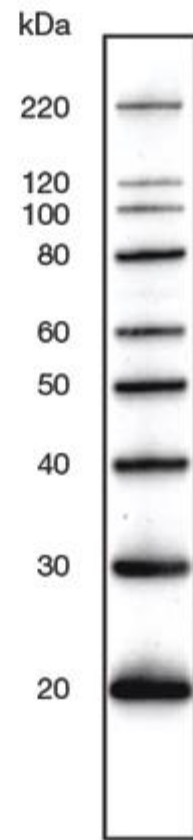

**Fig1 B**

**VEGFA  
(23 KD)**

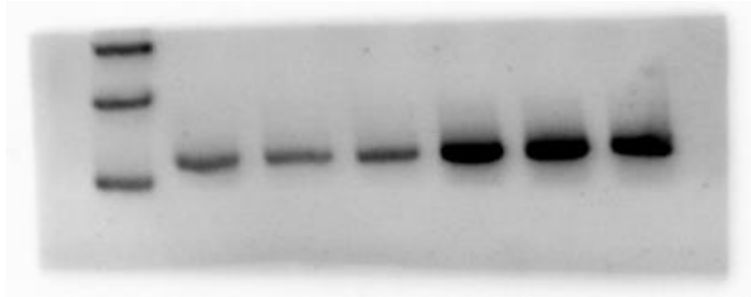

**$\beta$ -actin  
(42 KD)**

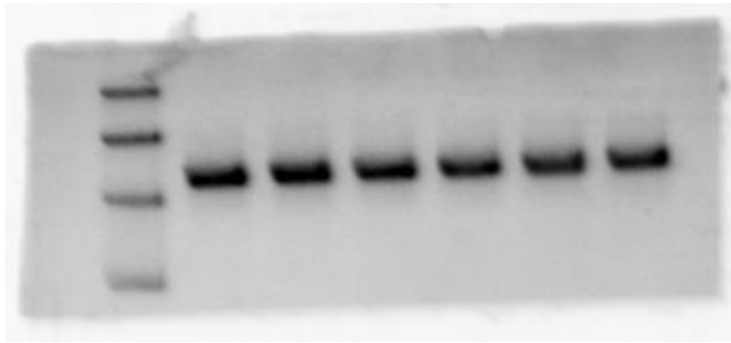

**Fig1 C**

**VEGFA  
(23 KD)**

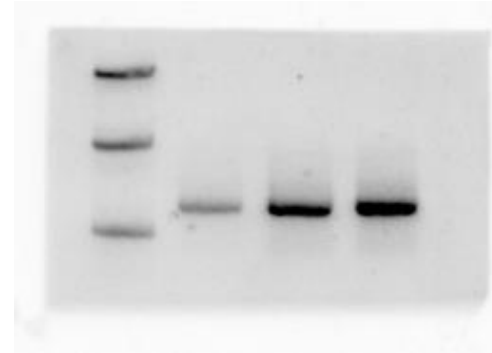

**$\beta$ -actin  
(42 KD)**

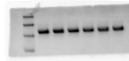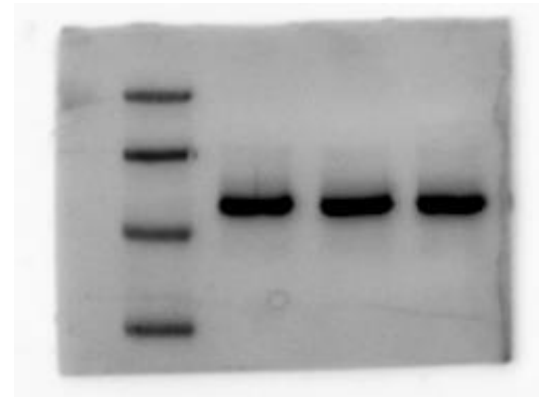

**Fig1 F**

**CD9  
(22 KD)**

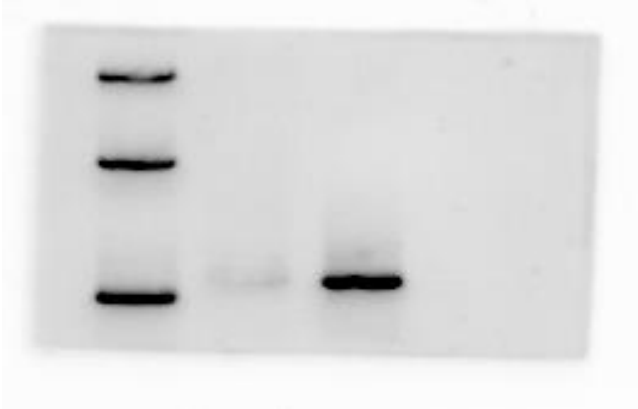

**CD81  
(20 KD)**

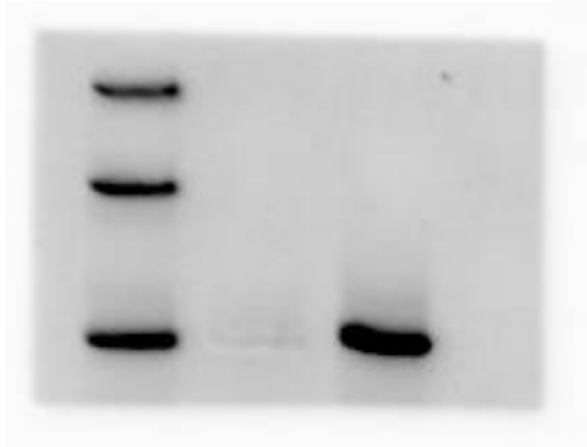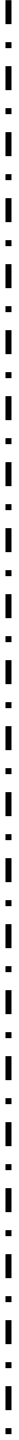

**Fig2A A172**

**VEGFA  
(23 KD)**

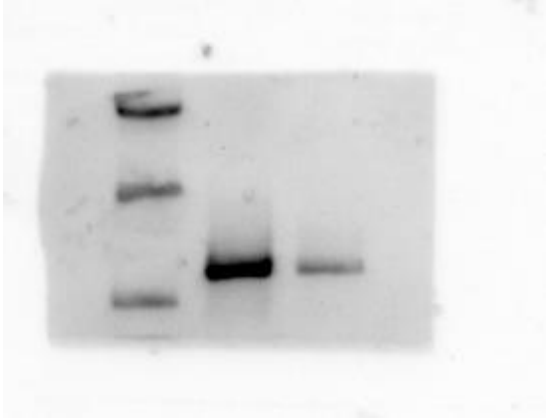

**$\beta$ -actin  
(42 KD)**

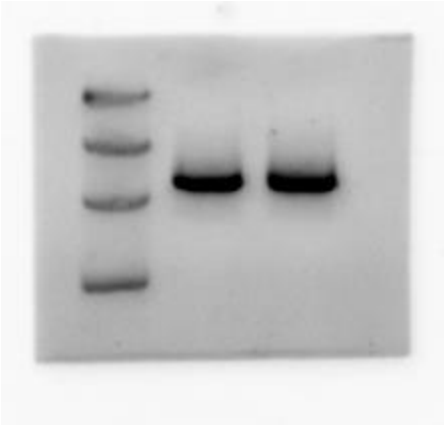

**Fig2A U251**

**VEGFA  
(23 KD)**

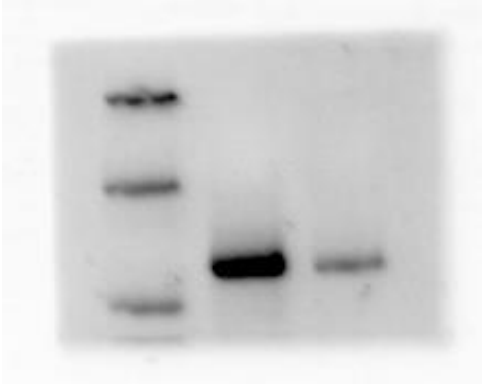

**$\beta$ -actin  
(42 KD)**

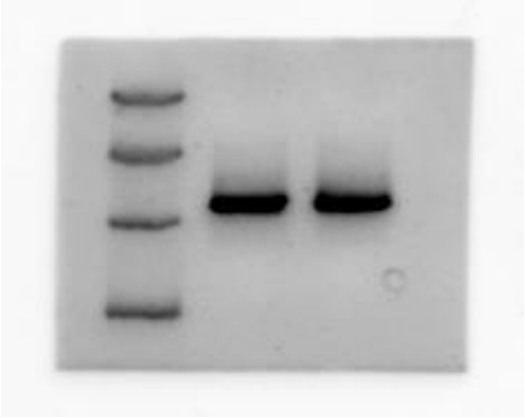

**Fig3E**

**VEGFA  
(23 KD)**

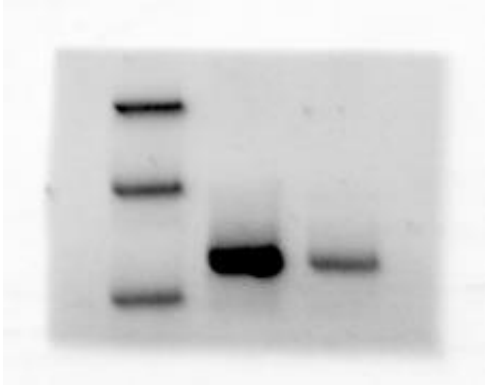

**$\beta$ -actin  
(42 KD)**

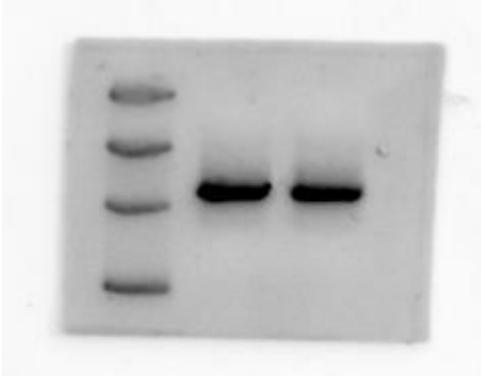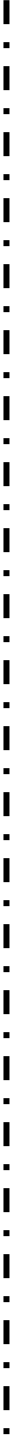

**Fig4B A172**

**VEGFA  
(23 KD)**

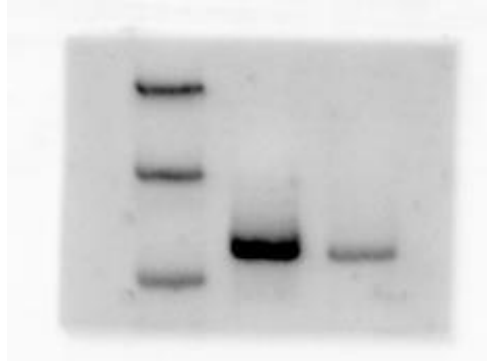

**$\beta$ -actin  
(42 KD)**

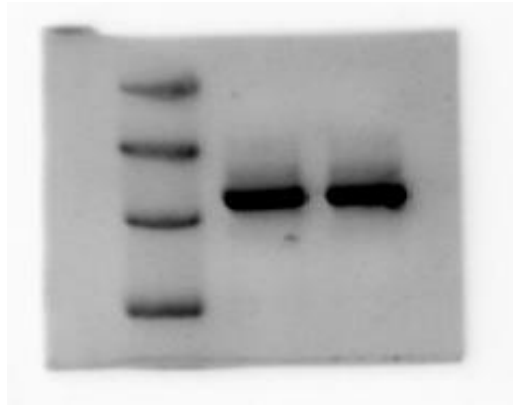

**Fig4B U251**

**VEGFA  
(23 KD)**

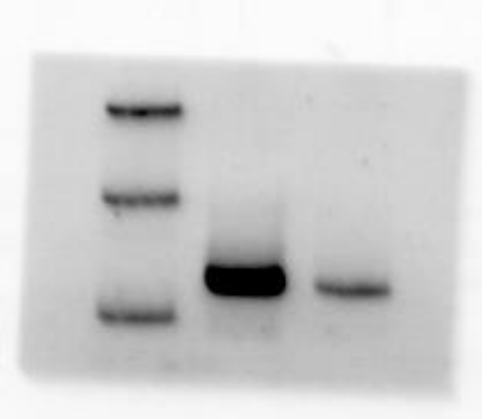

**$\beta$ -actin  
(42 KD)**

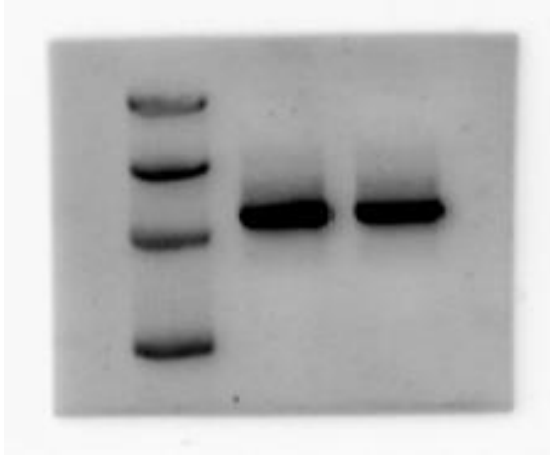

**Fig4G**

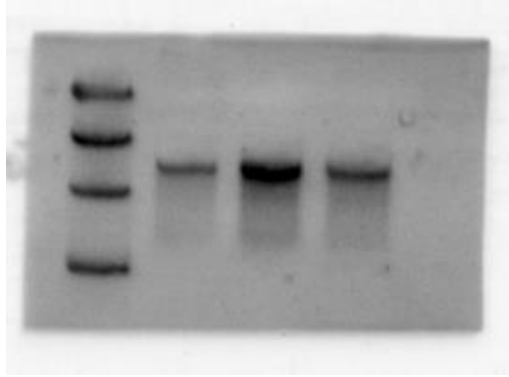

**TGF-β1  
(44 KD)**

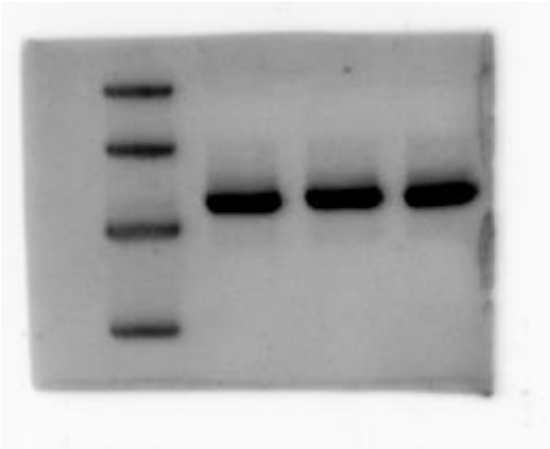

**β-actin  
(42 KD)**

**Fig4H**

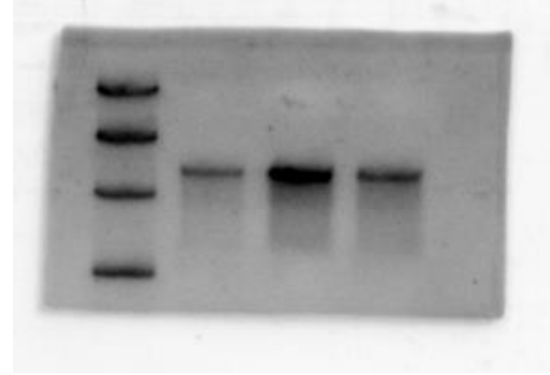

**TGF-β1  
(44 KD)**

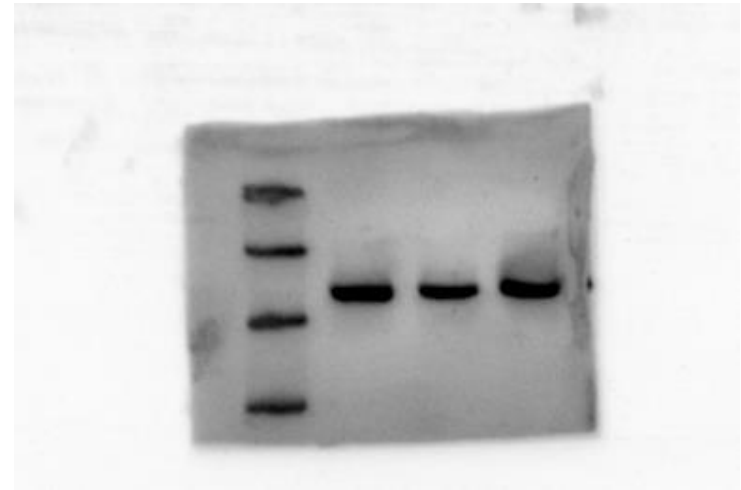

**β-actin  
(42 KD)**

**Fig5A A172**

**TGF-β1  
(44 KD)**

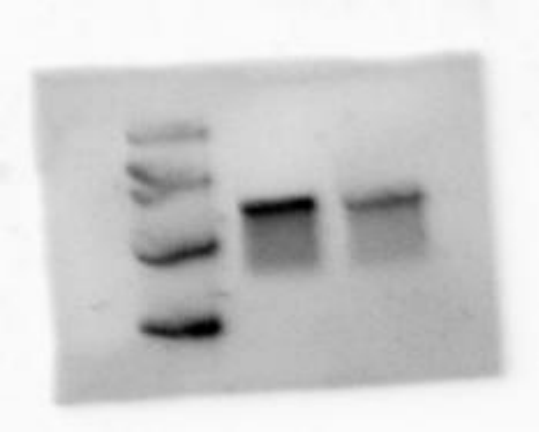

**β-actin  
(42 KD)**

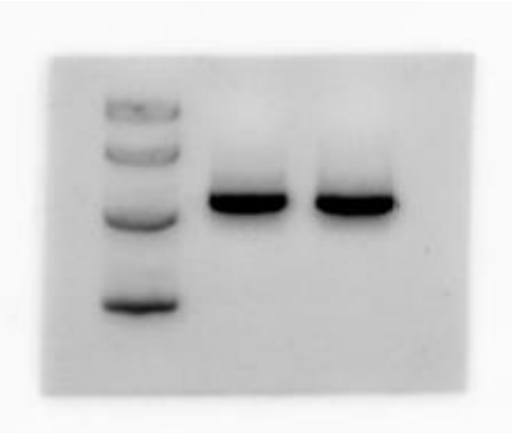

**Fig5A U251**

**TGF-β1  
(44 KD)**

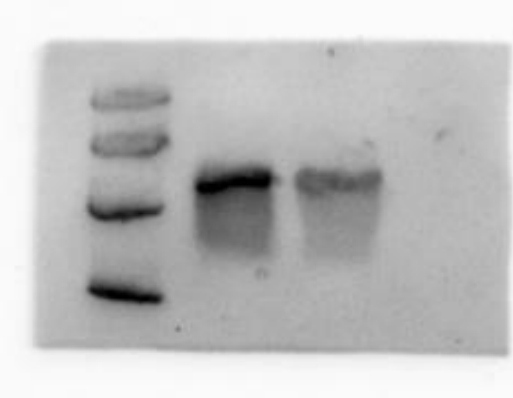

**β-actin  
(42 KD)**

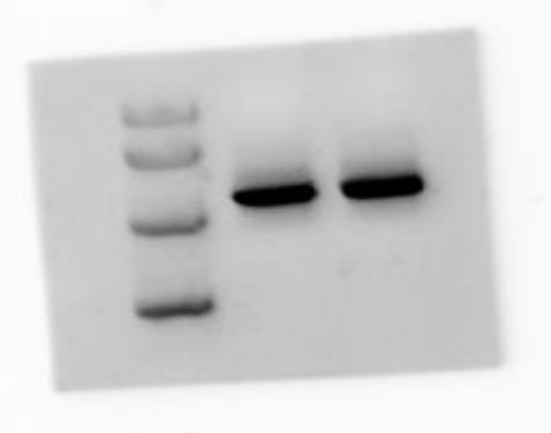



Fig6A A172

TGF- $\beta$ 1  
(44 KD)

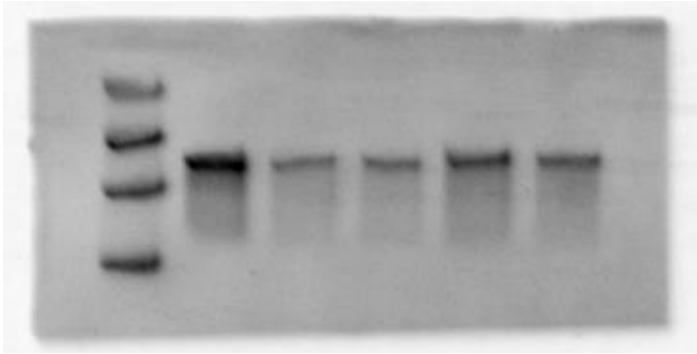

$\beta$ -actin  
(42 KD)

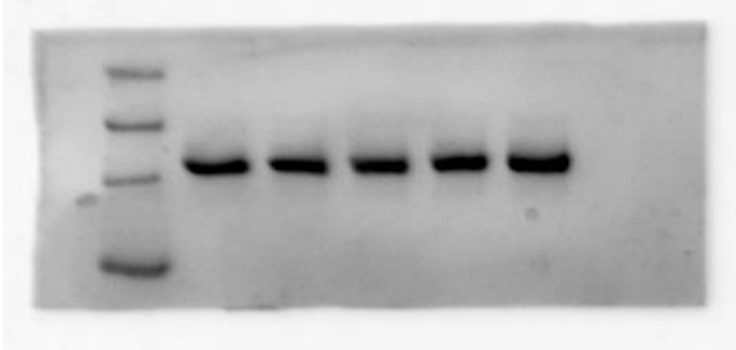

Fig6A U251

TGF- $\beta$ 1  
(44 KD)

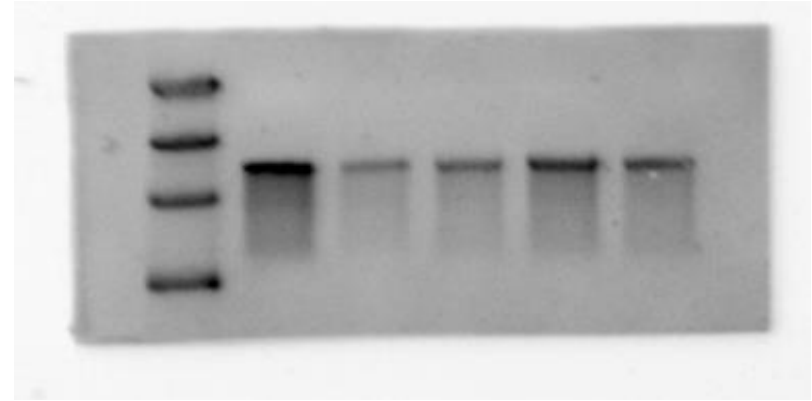

$\beta$ -actin  
(42 KD)

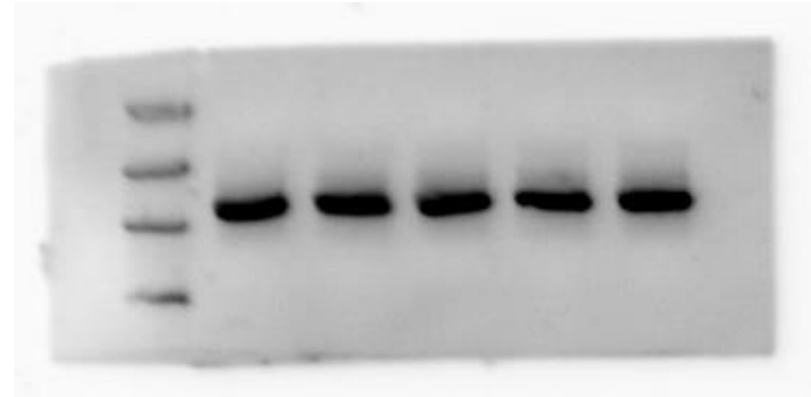

Supplement: 12885_2024_12803_MOESM1_ESM.pdf [file 12885_2024_12803_MOESM1_ESM.pdf]
